# Supplementary material
Source: PubMed Central journal article supplement (PMC4423204)
Supplement: bi501489r_si_001.pdf [file bi501489r_si_001.pdf]

# Spectroscopic studies reveal that the heme regulatory motifs of heme oxygenase-2 are dynamically disordered and exhibit redox-dependent interaction with heme

*Ireena Bagai<sup>1</sup>, Ritimukta Sarangi<sup>2</sup>, Angela S. Fleischhacker<sup>1</sup>, Ajay Sharma<sup>3</sup>, Brian M. Hoffman<sup>3</sup>, Erik Zuiderweg<sup>1</sup> and Stephen W. Ragsdale<sup>1</sup>*

<sup>1</sup>Department of Biological Chemistry, University of Michigan, Ann Arbor, MI 48019

<sup>2</sup>Stanford Synchrotron Radiation Labs, Stanford University, Menlo Park, CA 94025

<sup>3</sup>Department of Chemistry, Northwestern University, Evanston, IL 60208

**Supplementary Material**

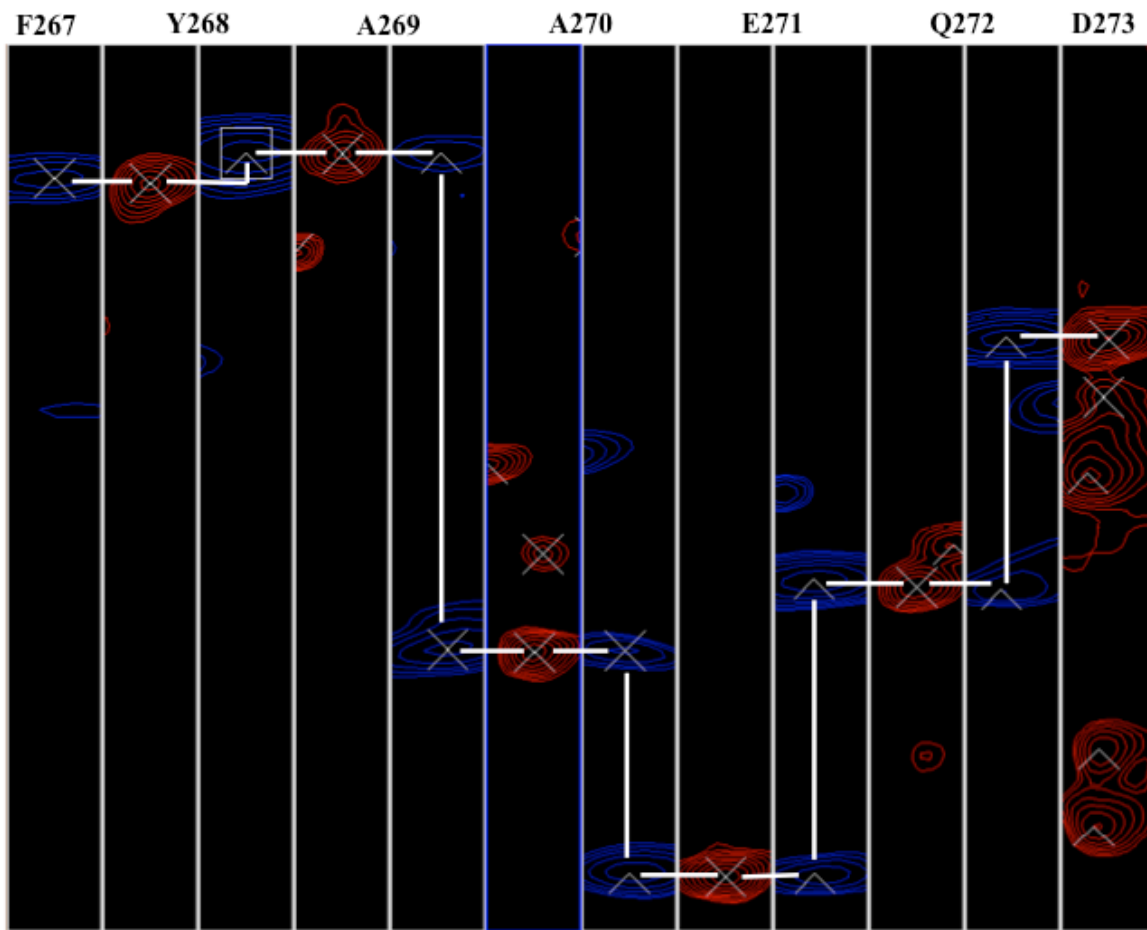

Supp figure 1. Portions of HNC and HN(CA)CO spectra illustrating the sequential connectivities between F267 and D273

| <b>Residue</b> | $^1\text{H}_\text{N}$ | $^{15}\text{N}_\text{H}$ | $^{13}\text{C}_\alpha$ | $^{13}\text{C}_\beta$ | $^{13}\text{C}_\text{O}$ |
|----------------|-----------------------|--------------------------|------------------------|-----------------------|--------------------------|
| <b>Met1</b>    |                       |                          |                        |                       |                          |
| <b>Ser2</b>    |                       |                          |                        |                       |                          |
| <b>Ala3</b>    | 8.26                  | 126.02                   | 52.03                  | 18.42                 | 177.55                   |
| <b>Glu4</b>    | 8.23                  | 120.18                   | 56.09                  | 29.29                 | 176.43                   |
| <b>Val5</b>    | 7.96                  | 120.73                   | 61.69                  | 32.01                 | 176.04                   |
| <b>Glu6</b>    | 8.40                  | 125.01                   | 56.13                  | 29.52                 | 176.56                   |
| <b>Thr7</b>    | 8.14                  | 115.97                   | 61.16                  | 69.31                 | 174.46                   |
| <b>Ser8</b>    | 8.32                  | 118.56                   | 57.90                  | 63.12                 |                          |
| <b>Glu9</b>    | 8.37                  | 123.15                   | 56.28                  | 29.47                 | 176.90                   |
| <b>Gly10</b>   | 8.34                  | 110.40                   | 44.89                  |                       | 174.05                   |
| <b>Val11</b>   | 7.86                  | 119.55                   | 61.70                  | 31.96                 |                          |
| <b>Asp12</b>   | 8.38                  | 124.20                   | 53.94                  | 40.69                 | 176.63                   |
| <b>Glu13</b>   | 8.44                  | 123.20                   | 56.76                  | 29.04                 | 177.18                   |
| <b>Ser14</b>   | 8.31                  | 116.64                   | 59.39                  | 62.88                 | 175.15                   |
| <b>Glu15</b>   | 8.15                  | 122.33                   | 56.66                  | 29.05                 | 176.90                   |
| <b>Lys16</b>   | 7.99                  | 121.84                   | 56.27                  | 31.61                 | 176.98                   |
| <b>Lys17</b>   |                       |                          |                        |                       |                          |
| <b>Asn18</b>   | 8.11                  | 120.70                   | 53.07                  |                       |                          |
| <b>Ser19</b>   | 8.31                  | 121.79                   | 57.38                  |                       | 178.16                   |
| <b>Gly20</b>   | 8.23                  | 108.45                   | 45.13                  |                       |                          |
| <b>Ala21</b>   | 7.96                  | 123.89                   | 52.27                  | 18.26                 | 178.08                   |
| <b>Leu22</b>   | 8.06                  | 120.97                   | 55.16                  | 41.08                 | 177.79                   |
| <b>Glu23</b>   | 8.18                  | 121.48                   | 56.71                  | 29.10                 | 177.01                   |
| <b>Lys24</b>   | 8.09                  | 121.69                   | 56.51                  | 31.80                 | 177.09                   |
| <b>Glu25</b>   | 8.27                  | 121.17                   | 56.81                  | 29.10                 | 176.81                   |
| <b>Asn26</b>   | 8.27                  | 119.27                   | 53.35                  | 38.10                 | 175.59                   |
| <b>Gln27</b>   | 8.17                  | 120.54                   | 56.64                  |                       | 176.36                   |
| <b>Met28</b>   |                       |                          |                        |                       |                          |
| <b>Arg29</b>   | 8.09                  | 122.26                   | 55.93                  | 29.84                 | 176.18                   |
| <b>Met30</b>   | 8.17                  | 121.46                   |                        | 32.20                 | 175.37                   |
| <b>Ala31</b>   | 7.96                  | 124.47                   | 51.40                  | 19.36                 | 176.45                   |
| <b>Asp32</b>   | 8.29                  | 120.64                   | 53.90                  | 40.33                 | 177.26                   |
| <b>Leu33</b>   | 9.36                  | 126.87                   | 58.15                  | 40.77                 | 177.96                   |
| <b>Ser34</b>   | 10.23                 | 113.65                   | 62.55                  | 60.76                 | 176.74                   |
| <b>Glu35</b>   | 7.22                  | 124.81                   | 57.93                  | 29.03                 | 178.49                   |
| <b>Leu36</b>   | 8.35                  | 120.91                   | 57.21                  | 41.00                 | 181.93                   |
| <b>Leu37</b>   | 8.70                  | 119.65                   | 57.99                  | 40.82                 | 178.31                   |
| <b>Lys38</b>   |                       |                          |                        |                       |                          |
| <b>Glu39</b>   |                       |                          |                        |                       |                          |

|              |      |        |       |       |        |
|--------------|------|--------|-------|-------|--------|
| <b>Gly40</b> |      |        |       |       |        |
| <b>Thr41</b> |      |        |       |       |        |
| <b>Lys42</b> |      |        |       |       |        |
| <b>Glu43</b> |      |        |       |       |        |
| <b>Ala44</b> |      |        |       |       |        |
| <b>His45</b> |      |        |       |       |        |
| <b>Asp46</b> |      |        |       |       |        |
| <b>Arg47</b> |      |        |       |       |        |
| <b>Ala48</b> |      |        |       |       |        |
| <b>Glu49</b> |      |        |       |       |        |
| <b>Asn50</b> |      |        |       |       |        |
| <b>Thr51</b> |      |        |       |       |        |
| <b>Gln52</b> |      |        |       |       |        |
| <b>Phe53</b> |      |        |       |       |        |
| <b>Val54</b> |      |        |       |       |        |
| <b>Lys55</b> |      |        |       |       |        |
| <b>Asp56</b> |      |        |       |       |        |
| <b>Phe57</b> |      |        |       |       |        |
| <b>Leu58</b> | 8.11 | 120.73 | 53.89 | 40.44 |        |
| <b>Lys59</b> | 8.20 | 122.67 | 56.30 | 31.68 | 177.39 |
| <b>Gly60</b> | 8.34 | 109.51 | 44.96 |       | 174.07 |
| <b>Asn61</b> | 8.37 | 120.38 | 51.62 | 37.66 |        |
| <b>Ile62</b> | 7.32 | 118.32 | 58.21 | 39.29 | 174.20 |
| <b>Lys63</b> | 8.37 | 126.00 | 54.73 | 32.36 |        |
| <b>Lys64</b> | 9.55 | 116.68 | 59.34 | 28.10 |        |
| <b>Glu65</b> | 7.78 | 117.67 | 56.89 | 27.87 |        |
| <b>Leu66</b> | 7.61 | 118.99 | 52.37 | 39.63 | 175.00 |
| <b>Phe67</b> | 8.83 | 119.44 | 62.96 | 35.44 |        |
| <b>Lys68</b> |      |        |       |       |        |
| <b>Leu69</b> | 8.25 | 121.81 | 54.07 | 40.68 |        |
| <b>Ala70</b> | 8.12 | 123.34 | 55.54 |       | 178.04 |
| <b>Thr71</b> |      |        |       |       |        |
| <b>Thr72</b> |      |        |       |       |        |
| <b>Ala73</b> |      |        |       |       |        |
| <b>Leu74</b> |      |        |       |       |        |
| <b>Tyr75</b> |      |        |       |       |        |
| <b>Phe76</b> |      |        |       |       |        |
| <b>Thr77</b> |      |        |       |       |        |
| <b>Tyr78</b> |      |        |       |       |        |
| <b>Ser79</b> |      |        |       |       |        |
| <b>Ala80</b> |      |        |       |       |        |
| <b>Leu81</b> | 8.69 | 124.24 | 55.09 |       |        |
| <b>Glu82</b> | 8.09 | 114.18 | 59.21 | 31.78 | 178.52 |

|               |      |        |       |       |        |
|---------------|------|--------|-------|-------|--------|
| <b>Glu83</b>  | 7.45 | 117.14 | 58.05 | 29.46 |        |
| <b>Glu84</b>  |      |        |       |       |        |
| <b>Met85</b>  | 8.71 | 121.95 | 59.93 | 31.52 | 176.70 |
| <b>Glu86</b>  | 7.80 | 117.00 | 59.21 | 28.24 | 180.24 |
| <b>Arg87</b>  | 7.83 | 119.80 | 58.82 | 29.43 | 177.78 |
| <b>Asn88</b>  | 7.08 | 113.92 | 53.56 | 39.58 | 175.87 |
| <b>Lys89</b>  | 6.96 | 120.16 | 59.38 | 29.36 | 174.40 |
| <b>Asp90</b>  | 8.11 | 115.70 | 52.89 | 41.36 |        |
| <b>His91</b>  | 8.21 | 127.86 | 56.27 | 31.67 | 175.82 |
| <b>Pro92</b>  |      |        |       |       |        |
| <b>Ala93</b>  | 7.02 | 122.46 | 54.53 | 18.42 | 178.18 |
| <b>Phe94</b>  | 8.14 | 119.10 | 57.40 | 41.63 |        |
| <b>Ala95</b>  |      |        |       |       |        |
| <b>Pro96</b>  |      |        |       |       |        |
| <b>Leu97</b>  | 8.14 | 113.98 | 52.46 | 38.88 | 175.09 |
| <b>Tyr98</b>  | 7.00 | 121.87 | 56.97 | 37.56 | 174.16 |
| <b>Phe99</b>  | 8.76 | 129.50 | 55.66 | 39.80 | 171.51 |
| <b>Pro100</b> |      |        |       |       |        |
| <b>Met101</b> | 7.68 | 116.77 | 57.26 | 30.59 | 178.25 |
| <b>Glu102</b> | 9.10 | 118.43 | 60.57 | 28.36 | 177.17 |
| <b>Leu103</b> | 7.47 | 110.14 | 54.44 | 42.24 |        |
| <b>His104</b> | 6.86 | 116.26 | 58.03 | 27.35 | 177.78 |
| <b>Arg105</b> |      |        |       |       |        |
| <b>Lys106</b> |      |        |       |       |        |
| <b>Glu107</b> | 8.58 | 120.77 | 59.57 | 27.68 | 178.37 |
| <b>Ala108</b> | 7.87 | 125.18 | 54.57 | 16.86 | 179.33 |
| <b>Leu109</b> | 8.42 | 115.69 | 57.11 | 41.97 | 178.73 |
| <b>Thr110</b> |      |        |       |       |        |
| <b>Lys111</b> |      |        |       |       |        |
| <b>Asp112</b> |      |        |       |       |        |
| <b>Met113</b> |      |        |       |       |        |
| <b>Glu114</b> |      |        |       |       |        |
| <b>Tyr115</b> |      |        |       |       |        |
| <b>Phe116</b> | 7.98 | 123.67 | 55.23 |       | 177.33 |
| <b>Phe117</b> | 8.05 | 120.75 | 54.29 | 40.41 | 176.58 |
| <b>Gly118</b> | 8.16 | 109.18 | 44.81 |       | 172.70 |
| <b>Glu119</b> |      |        |       |       |        |
| <b>Asn120</b> | 7.24 | 123.27 | 56.48 | 37.47 |        |
| <b>Trp121</b> | 8.09 | 119.05 | 57.38 | 27.96 |        |
| <b>Glu122</b> | 7.93 | 122.03 | 56.97 |       |        |
| <b>Glu123</b> | 8.14 | 119.56 | 56.05 |       |        |
| <b>Gln124</b> | 8.36 | 121.85 | 56.69 |       |        |
| <b>Val125</b> | 8.04 | 121.71 |       |       | 177.45 |

|               |      |        |       |       |        |
|---------------|------|--------|-------|-------|--------|
| <b>Gln126</b> | 8.18 | 120.88 |       |       |        |
| <b>Cys127</b> | 8.09 | 120.49 | 53.80 | 41.39 | 172.86 |
| <b>Pro128</b> |      |        |       |       |        |
| <b>Lys129</b> |      |        |       |       |        |
| <b>Ala130</b> |      |        |       |       |        |
| <b>Ala131</b> | 8.00 | 123.33 | 52.22 | 18.33 |        |
| <b>Gln132</b> | 8.25 | 119.03 | 56.03 | 29.27 |        |
| <b>Lys133</b> | 8.05 | 122.86 | 55.77 | 31.82 | 176.27 |
| <b>Tyr134</b> | 8.21 | 123.50 | 55.65 | 32.42 | 175.42 |
| <b>Val135</b> |      |        |       |       |        |
| <b>Glu136</b> | 7.70 | 122.99 | 59.55 | 27.61 |        |
| <b>Arg137</b> | 7.28 | 114.97 | 56.47 | 29.12 | 176.92 |
| <b>Ile138</b> | 8.19 | 124.55 |       |       | 178.51 |
| <b>His139</b> | 8.28 | 123.22 | 59.50 | 31.09 |        |
| <b>Tyr140</b> |      |        |       |       |        |
| <b>Ile141</b> |      |        |       |       |        |
| <b>Gly142</b> |      |        |       |       |        |
| <b>Gln143</b> |      |        |       |       |        |
| <b>Asn144</b> |      |        |       |       |        |
| <b>Glu145</b> |      |        |       |       |        |
| <b>Pro146</b> |      |        |       |       |        |
| <b>Glu147</b> | 9.80 | 119.71 | 58.62 | 27.13 | 175.19 |
| <b>Leu148</b> | 8.31 | 114.04 | 54.53 | 41.28 | 180.18 |
| <b>Leu149</b> | 8.26 | 125.44 | 58.17 | 40.74 | 179.79 |
| <b>Val150</b> | 8.98 | 118.33 | 64.91 | 30.33 | 175.72 |
| <b>Ala151</b> | 7.82 | 121.84 | 55.47 | 20.09 |        |
| <b>His152</b> | 8.06 | 120.25 | 55.96 | 29.87 |        |
| <b>Ala153</b> | 8.08 | 122.93 | 52.23 | 18.37 | 177.80 |
| <b>Tyr154</b> |      |        |       |       |        |
| <b>Thr155</b> |      |        |       |       |        |
| <b>Arg156</b> |      |        |       |       |        |
| <b>Tyr157</b> |      |        |       |       |        |
| <b>Met158</b> |      |        |       |       |        |
| <b>Gly159</b> |      |        |       |       |        |
| <b>Asp160</b> |      |        |       |       |        |
| <b>Leu161</b> |      |        |       |       |        |
| <b>Ser162</b> |      |        |       |       |        |
| <b>Gly163</b> |      |        |       |       |        |
| <b>Gly164</b> |      |        |       |       |        |
| <b>Gln165</b> |      |        |       |       |        |
| <b>Val166</b> |      |        |       |       |        |
| <b>Leu167</b> |      |        |       |       |        |
| <b>Lys168</b> |      |        |       |       |        |

|               |       |        |       |       |        |
|---------------|-------|--------|-------|-------|--------|
| <b>Lys169</b> | 8.06  | 124.46 | 62.29 |       | 176.24 |
| <b>Val170</b> | 8.30  | 124.64 | 56.53 |       | 176.86 |
| <b>Ala171</b> | 7.52  | 115.76 | 55.72 | 30.62 | 176.35 |
| <b>Gln172</b> | 7.21  | 114.86 | 61.16 | 32.65 | 174.69 |
| <b>Arg173</b> | 8.10  | 121.19 | 53.10 | 30.59 | 174.36 |
| <b>Ala174</b> | 8.51  | 124.86 | 56.86 | 26.38 |        |
| <b>Leu175</b> |       |        |       |       |        |
| <b>Lys176</b> | 7.64  | 121.69 | 57.01 | 28.38 |        |
| <b>Leu177</b> | 6.71  | 121.01 | 52.78 | 42.31 | 174.28 |
| <b>Pro178</b> |       |        |       |       |        |
| <b>Ser179</b> |       |        |       |       |        |
| <b>Thr180</b> | 7.11  | 108.96 | 61.41 | 67.20 | 176.13 |
| <b>Gly181</b> | 7.06  | 107.37 | 45.31 |       | 174.21 |
| <b>Glu182</b> | 9.07  | 125.13 | 58.99 | 26.58 | 176.52 |
| <b>Gly183</b> | 8.67  | 110.85 | 45.52 |       | 173.12 |
| <b>Thr184</b> | 7.45  | 106.27 | 59.73 | 68.92 |        |
| <b>Gln185</b> | 8.40  | 120.16 | 60.20 | 30.46 |        |
| <b>Phe186</b> | 8.93  | 115.37 | 58.72 | 39.98 |        |
| <b>Tyr187</b> | 7.70  | 123.48 | 57.98 | 38.92 |        |
| <b>Leu188</b> | 7.74  | 120.83 | 60.91 |       | 177.53 |
| <b>Phe189</b> |       |        |       |       |        |
| <b>Glu190</b> | 8.75  | 123.08 | 58.11 | 28.10 | 176.81 |
| <b>Asn191</b> | 8.69  | 115.15 | 52.05 | 38.19 |        |
| <b>Val192</b> | 6.84  | 120.23 | 60.60 | 31.15 | 174.22 |
| <b>Asp193</b> | 8.25  | 126.96 | 55.75 | 40.17 | 176.40 |
| <b>Asn194</b> | 7.71  | 116.78 | 52.12 | 38.75 |        |
| <b>Ala195</b> | 10.14 | 122.21 | 54.61 | 17.78 |        |
| <b>Gln196</b> | 8.05  | 117.16 | 58.90 | 27.01 | 179.13 |
| <b>Gln197</b> | 7.87  | 120.00 | 57.96 | 27.63 | 179.03 |
| <b>Phe198</b> | 8.34  | 122.71 | 61.86 | 38.52 | 177.21 |
| <b>Lys199</b> | 8.40  | 118.30 | 60.33 | 31.42 | 178.60 |
| <b>Gln200</b> | 7.44  | 116.76 | 58.39 | 27.51 | 178.82 |
| <b>Leu201</b> | 7.56  | 124.67 | 57.57 | 40.10 | 177.74 |
| <b>Tyr202</b> | 8.60  | 122.65 | 62.57 | 38.31 | 178.86 |
| <b>Arg203</b> | 8.51  | 116.34 | 59.98 | 29.93 | 177.63 |
| <b>Ala204</b> | 7.92  | 120.95 | 54.84 | 16.81 | 181.89 |
| <b>Arg205</b> | 8.37  | 118.97 | 57.04 | 29.11 | 179.18 |
| <b>Met206</b> | 8.35  | 118.24 | 59.33 | 33.20 | 178.65 |
| <b>Asn207</b> | 8.37  | 118.12 | 53.75 | 36.87 | 175.58 |
| <b>Ala208</b> | 7.44  | 121.69 | 51.41 | 18.16 | 178.55 |
| <b>Leu209</b> | 7.02  | 119.06 | 55.38 | 40.74 | 177.75 |
| <b>Asp210</b> | 8.81  | 126.04 | 53.24 | 38.91 | 174.48 |
| <b>Leu211</b> | 7.43  | 124.87 | 52.15 | 46.02 | 176.51 |

|               |      |        |       |       |        |
|---------------|------|--------|-------|-------|--------|
| <b>Asn212</b> | 8.49 | 119.80 | 51.12 | 37.99 | 175.66 |
| <b>Met213</b> |      |        |       |       |        |
| <b>Lys214</b> | 8.33 | 119.13 | 58.21 | 30.44 | 179.61 |
| <b>Thr215</b> | 8.20 | 117.08 | 66.88 |       |        |
| <b>Lys216</b> | 8.31 | 121.65 | 61.42 | 31.18 |        |
| <b>Glu217</b> | 8.32 | 117.77 | 59.58 | 28.71 | 180.13 |
| <b>Arg218</b> | 7.99 | 121.36 | 59.28 | 29.70 | 179.80 |
| <b>Ile219</b> | 8.58 | 123.62 | 65.83 | 36.72 | 177.65 |
| <b>Val220</b> | 8.07 | 122.19 | 66.74 |       | 178.92 |
| <b>Glu221</b> | 8.10 | 121.48 | 59.34 |       | 179.79 |
| <b>Glu222</b> | 8.69 | 122.81 | 57.99 | 27.22 | 178.26 |
| <b>Ala223</b> | 9.00 | 124.41 | 54.80 | 17.93 | 180.04 |
| <b>Asn224</b> | 8.27 | 118.53 | 58.19 | 38.48 | 178.63 |
| <b>Lys225</b> | 8.28 | 123.22 | 59.50 | 31.09 |        |
| <b>Ala226</b> |      |        |       |       |        |
| <b>Phe227</b> | 8.69 | 115.15 | 52.05 | 38.19 |        |
| <b>Glu228</b> | 8.25 | 115.73 | 59.98 |       |        |
| <b>Tyr229</b> | 7.55 | 123.53 | 58.04 | 41.36 |        |
| <b>Asn230</b> | 7.25 | 123.04 | 56.45 | 37.42 |        |
| <b>Met231</b> | 8.01 | 123.99 |       |       | 177.60 |
| <b>Gln232</b> | 8.04 | 120.56 | 59.16 | 27.10 |        |
| <b>Ile233</b> | 6.47 | 112.77 | 57.09 | 37.31 |        |
| <b>Phe234</b> | 7.98 | 122.73 | 55.40 | 30.32 |        |
| <b>Asn235</b> | 7.99 | 125.72 | 54.44 | 40.38 | 179.28 |
| <b>Glu236</b> |      |        |       |       |        |
| <b>Leu237</b> | 7.82 | 121.51 | 55.40 | 41.06 | 177.93 |
| <b>Asp238</b> | 7.87 | 121.17 | 54.95 |       | 177.57 |
| <b>Gln239</b> | 8.21 | 121.67 | 56.40 | 29.47 | 177.03 |
| <b>Ala240</b> | 8.33 | 122.03 |       |       | 176.68 |
| <b>Gly241</b> | 8.19 | 109.05 | 44.84 |       | 172.73 |
| <b>Ser242</b> |      |        |       |       |        |
| <b>Thr243</b> | 8.28 | 121.80 |       |       | 175.21 |
| <b>Leu244</b> | 7.83 | 123.52 | 55.33 | 41.28 | 177.43 |
| <b>Ala245</b> | 8.12 | 124.19 | 52.28 | 18.17 | 177.82 |
| <b>Arg246</b> |      |        |       |       |        |
| <b>Glu247</b> | 8.42 | 121.75 | 56.50 | 29.47 |        |
| <b>Thr248</b> | 8.06 | 115.19 | 61.53 | 69.34 | 174.36 |
| <b>Leu249</b> | 8.19 | 124.65 | 54.78 | 41.34 | 177.45 |
| <b>Glu250</b> | 8.31 | 121.71 | 56.18 | 29.38 | 176.20 |
| <b>Asp251</b> | 8.21 | 121.33 | 54.24 | 40.60 | 176.51 |
| <b>Gly252</b> | 8.10 | 108.38 | 44.70 |       | 173.53 |
| <b>Phe253</b> | 7.96 | 121.32 | 55.44 | 38.14 | 173.84 |
| <b>Pro254</b> |      |        |       |       |        |



|               |      |        |       |       |        |
|---------------|------|--------|-------|-------|--------|
| <b>Val255</b> | 8.08 | 120.47 | 61.77 | 31.90 | 176.06 |
| <b>His256</b> | 8.12 | 121.38 | 53.15 | 30.58 |        |
| <b>Asp257</b> | 8.26 | 121.84 | 54.07 | 40.59 |        |
| <b>Gly258</b> | 8.30 | 109.78 | 45.23 |       | 174.52 |
| <b>Lys259</b> | 8.11 | 120.75 | 56.04 | 31.75 | 177.20 |
| <b>Gly260</b> | 8.35 | 109.67 | 44.96 |       | 174.07 |
| <b>Asp261</b> | 8.37 | 120.40 | 51.62 | 37.66 |        |
| <b>Met262</b> | 7.31 | 118.29 | 58.21 | 39.29 | 174.20 |
| <b>Arg263</b> | 8.37 | 125.95 | 54.73 | 32.36 |        |
| <b>Lys264</b> | 7.80 | 130.88 |       |       | 182.30 |
| <b>Cys265</b> | 8.30 | 120.79 | 53.61 | 40.73 | 172.84 |
| <b>Pro266</b> |      |        |       |       |        |
| <b>Phe267</b> | 7.83 | 119.01 | 57.49 | 38.65 | 175.14 |
| <b>Tyr268</b> | 7.76 | 121.28 | 57.08 | 38.27 | 175.04 |
| <b>Ala269</b> | 7.95 | 125.88 | 51.93 | 18.53 | 177.07 |
| <b>Ala270</b> | 8.02 | 122.85 | 52.30 | 18.36 | 177.98 |
| <b>Glu271</b> | 8.22 | 118.77 | 56.62 | 28.97 | 176.78 |
| <b>Gln272</b> | 8.09 | 119.76 | 55.79 | 28.50 | 175.79 |
| <b>Asp273</b> | 8.17 | 120.88 |       | 40.54 | 176.19 |
| <b>Lys274</b> | 8.08 | 121.75 | 56.34 | 31.57 | 177.35 |
| <b>Gly275</b> | 8.30 | 109.42 | 45.04 |       | 174.19 |
| <b>Ala276</b> | 7.89 | 123.73 | 52.15 | 18.29 | 177.91 |
| <b>Leu277</b> | 8.03 | 120.76 |       | 41.02 | 177.70 |
| <b>Glu278</b> | 8.21 | 121.67 | 56.40 | 29.47 | 177.03 |
| <b>Gly279</b> | 8.29 | 110.27 | 45.08 |       |        |
| <b>Ser280</b> | 8.03 | 115.57 | 57.59 |       |        |
| <b>Ser281</b> | 8.17 | 117.60 | 58.38 | 63.17 |        |
| <b>Cys282</b> | 8.33 | 121.56 | 53.67 | 40.90 | 172.73 |
| <b>Pro283</b> |      |        |       |       |        |
| <b>Phe284</b> | 7.86 | 119.58 | 57.03 | 38.66 | 175.34 |
| <b>Arg285</b> | 7.98 | 122.73 | 55.40 | 30.32 |        |
| <b>Thr286</b> | 8.03 | 115.78 | 61.40 | 69.27 | 173.82 |
| <b>Ala287</b> | 8.18 | 127.07 | 51.96 | 18.42 | 176.45 |
| <b>Met288</b> | 7.82 | 125.37 | 56.69 | 32.97 | 180.78 |

Supp figure 2. Backbone assignments for  $^{15}\text{N}$ ,  $^{13}\text{C}$ ,  $^2\text{H}$   $\text{Fe}^{3+}$ - $\text{HO}_2^0$ .

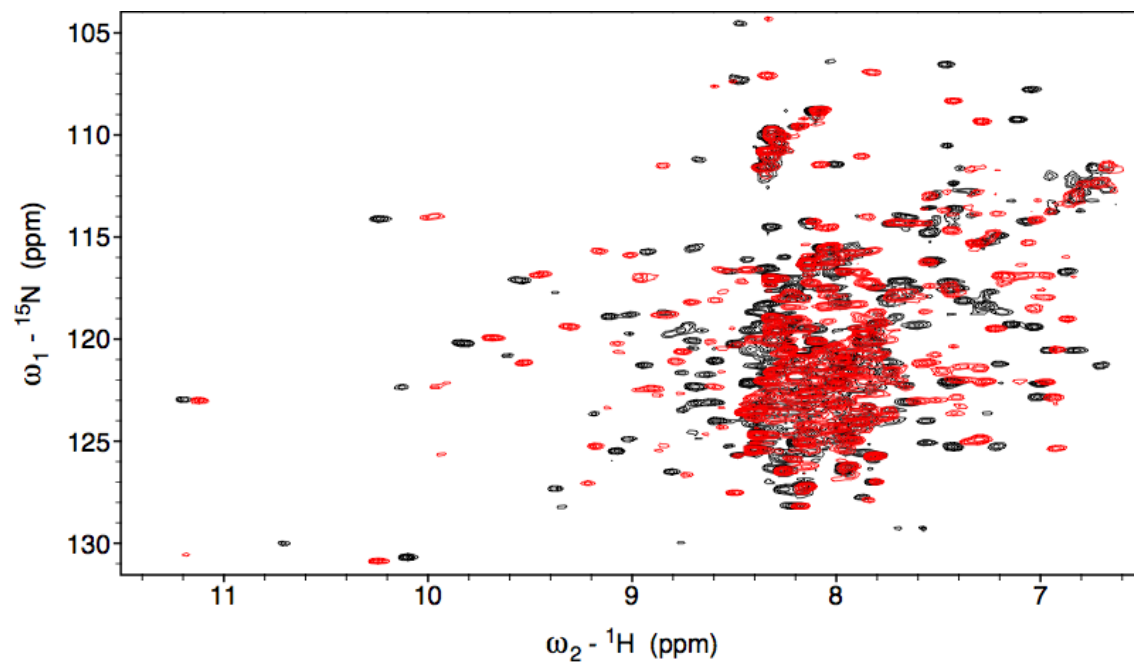

Supp figure 3. Overlay of the  ${}^1\text{H}$ -  ${}^{15}\text{N}$  TROSY of aquo-HO<sub>2</sub>O (black) with N<sub>3</sub>-heme-HO<sub>2</sub>O (red). HO<sub>2</sub> was present at a concentration of 250  $\mu\text{M}$  in 50 mM Tris, 50 mM KCl pH 7.0 buffer and NaN<sub>3</sub> was added to a concentration of 17.5 mM (500 times that of HO<sub>2</sub>).

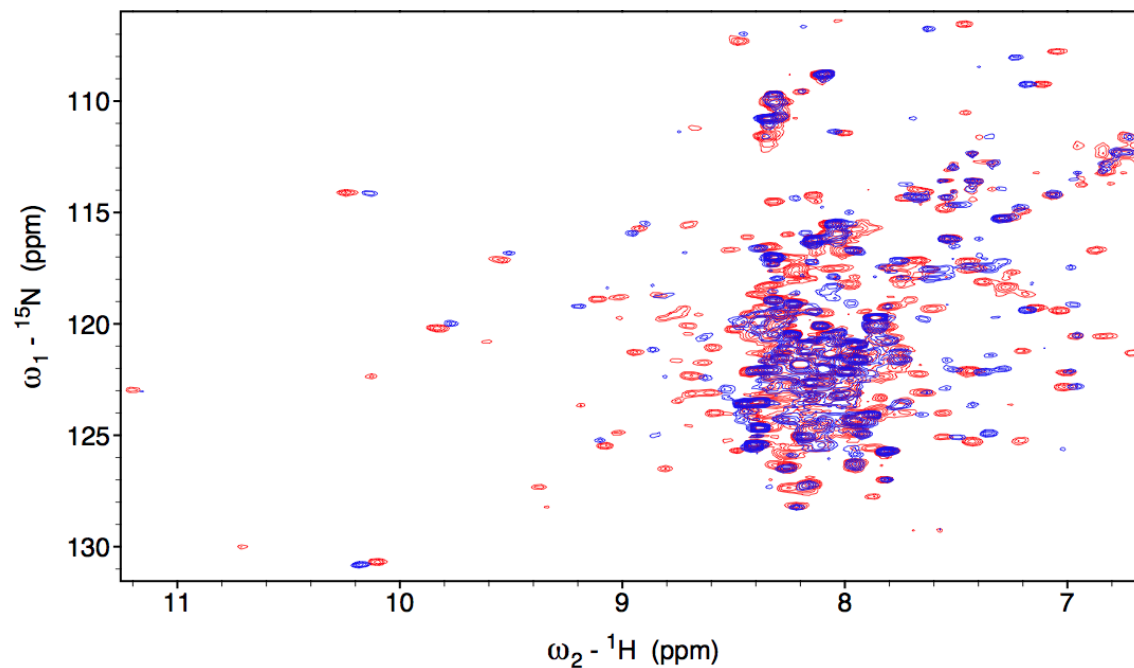

Supp figure 4. Overlay of the  ${}^1\text{H}$ - ${}^{15}\text{N}$  TROSY of  $\text{Fe}^{3+}\text{-HO}_2^0$  (red) with ZnPP-bound  $\text{HO}_2^0$  (blue). Spectrum of ZnPP-bound  $\text{HO}_2^0$  is not identical with  $\text{Fe}^{3+}\text{-HO}_2^0$  spectrum. Most peaks in the structured core region revealed chemical shift changes.  $\text{HO}_2^0$  was present at a concentration of approximately  $250\ \mu\text{M}$  each in  $50\ \text{mM}$  Tris,  $50\ \text{mM}$  KCl pH 7.0 buffer.

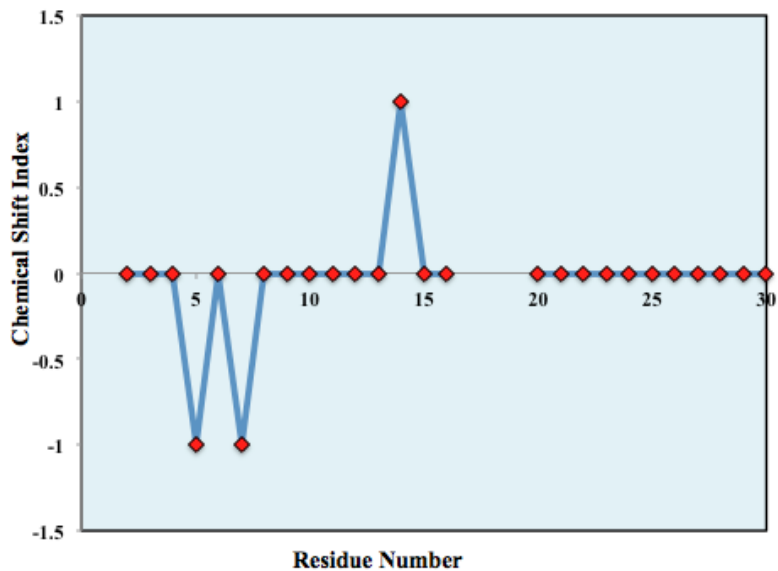

Supp figure 5. Chemical Shift Index (CSI) plot of  $\alpha$ -carbons of residues at the N-terminal end of HO<sub>2</sub>. The values of CSI for  $\beta$ -strand,  $\alpha$ -helix and random coil are +1, -1 and 0, respectively, as defined by the program CSI. Missing indices correspond to K17, N18 and S19, which could not be assigned. The assigned secondary structure illustrates N-terminal region to be a random coil in the Fe<sup>3+</sup>-HO<sub>2</sub><sup>0</sup>.

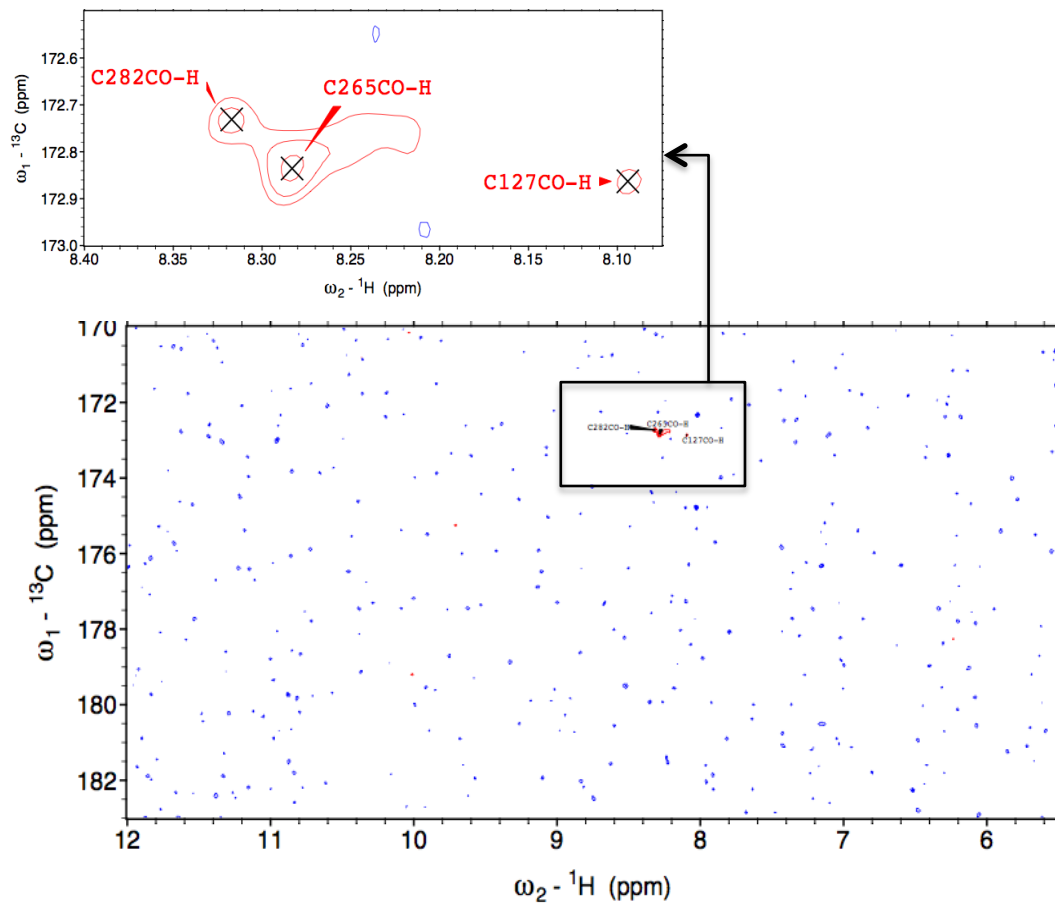

Supp figure 6. 2D HNCACO overlay of  $\text{Fe}^{3+}\text{-HO}_2^0$  (red) and  $\text{Fe}^{3+}\text{-HO}_2^{\text{R}}$  (blue) with selective cysteine labeling. The experiments were performed in 50mM Tris, 50mM KCl pH 7.0 buffer at 30 °C. No cysteines were observed in the  $\text{Fe}^{3+}\text{-HO}_2^{\text{R}}$  spectrum.

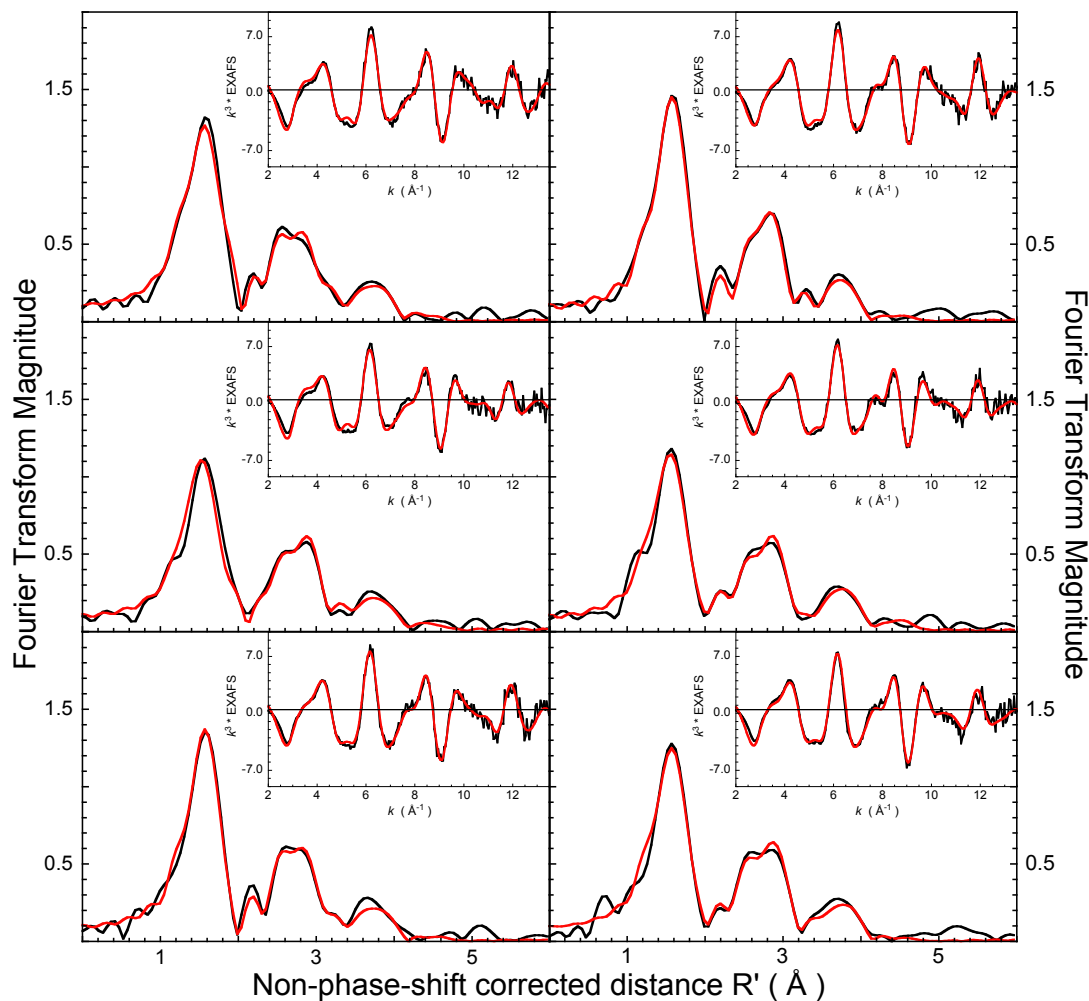

Supp figure 7: Comparison of the non phase-shift corrected Fourier transforms and the corresponding  $k^3$ -weighted EXAFS data (inset) for (top panel; left) WT Fe<sup>3+</sup>-HO2<sup>O</sup>, (top panel; right) WT Fe<sup>3+</sup>-HO2<sup>R</sup>, (middle panel; left) C127A/C265A Fe<sup>3+</sup>-HO2<sup>O</sup>, (middle panel; right) C127A/C265A Fe<sup>3+</sup>-HO2<sup>R</sup>, (bottom panel; left) C127A/C282A Fe<sup>3+</sup>-HO2<sup>O</sup> and (bottom panel; right) C127A/C282A Fe<sup>3+</sup>-HO2<sup>R</sup>. Data (—), FEFF best-fit (—).

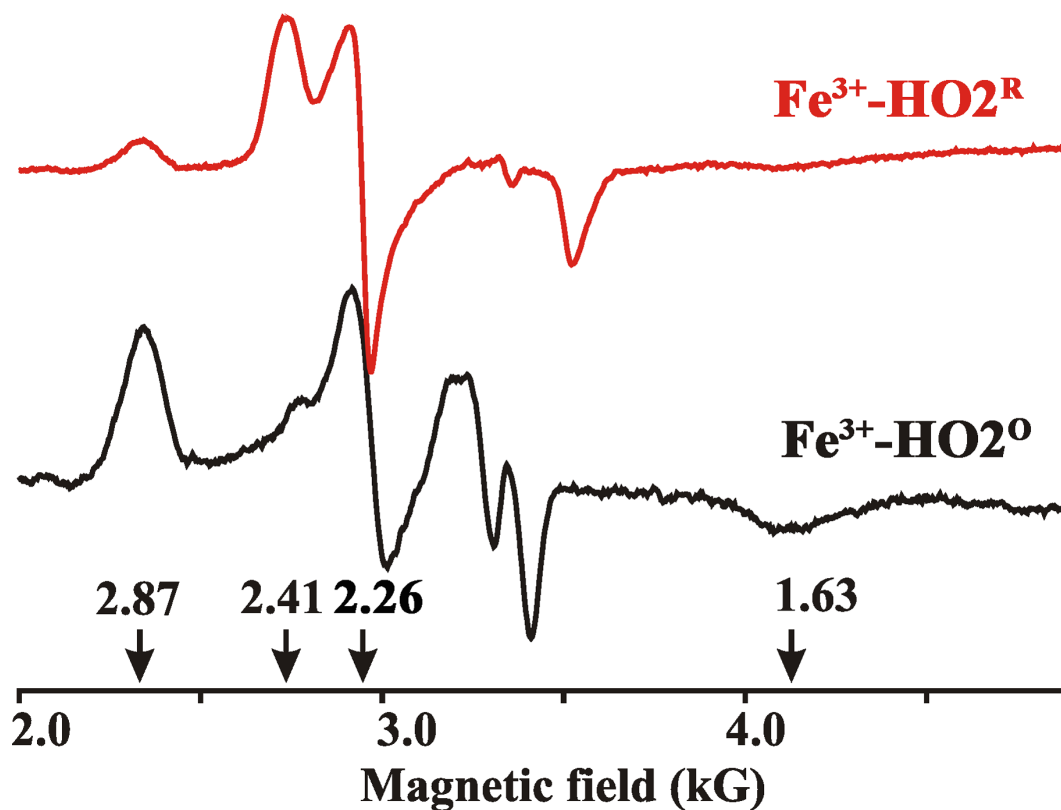

**Supp Figure 8.** X-band CW EPR spectra of  $\text{Fe}^{3+}\text{-HO}_2$ .  $\text{Fe}^{3+}\text{-HO}_2^{\text{O}}$  (black),  $\text{Fe}^{3+}\text{-HO}_2^{\text{R}}$  (red). The g-values are shown above the y-axis. Experimental conditions: temperature, 20K; microwave frequency, 9.374 GHz; microwave power, 2 mW; modulation amplitude, 10 G; scan time, 120 s.

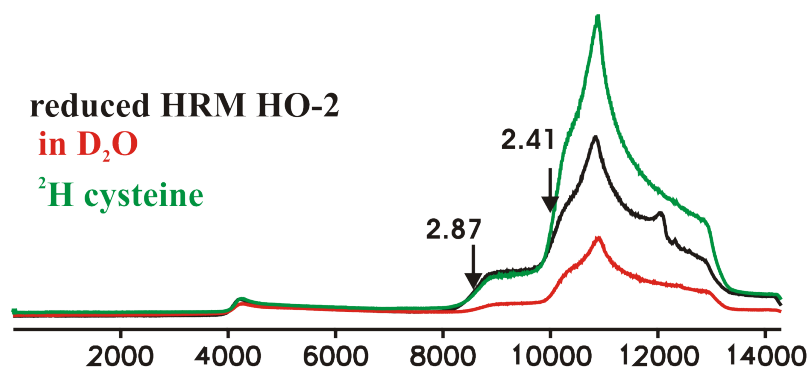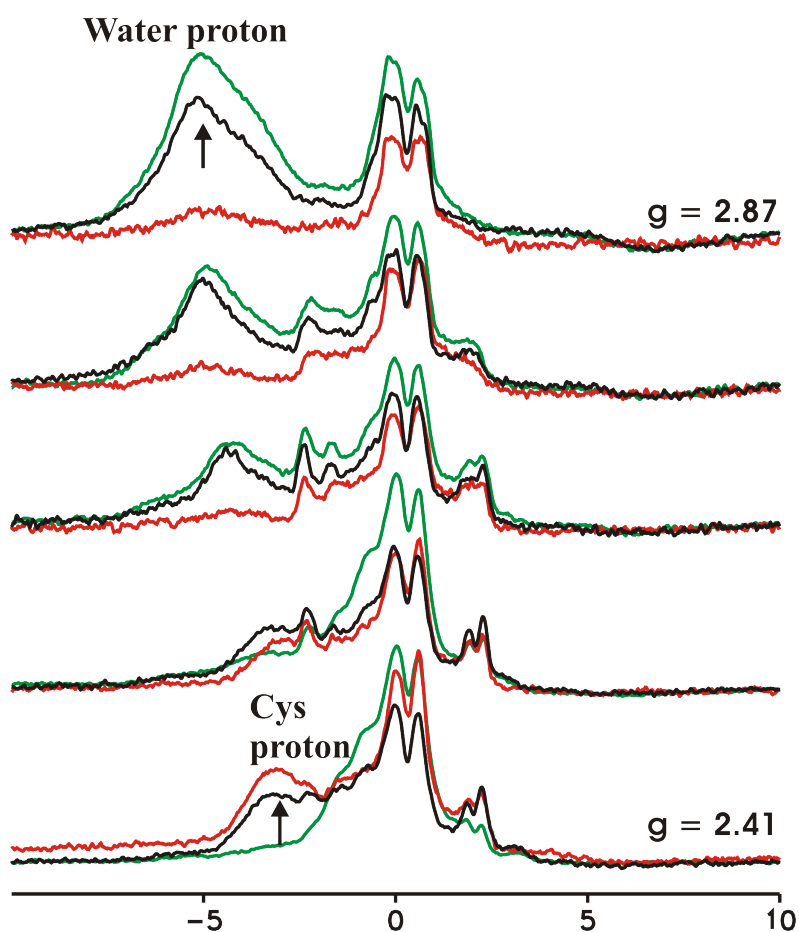

**Supp Figure 9.** <sup>1</sup>H 35 GHz CW ENDOR spectra of Fe<sup>3+</sup>-HO<sub>2</sub><sup>R</sup> recorded at several fields between g values 2.87-2.41. Spectra were recorded in H<sub>2</sub>O (black), D<sub>2</sub>O (red), or in H<sub>2</sub>O with <sup>2</sup>H-Cys labeled HO<sub>2</sub> (green). The braces show the range of the proton coupling. Experimental conditions: Temperature, 2K; Microwave frequency, 34.9 GHz; modulation amplitude, 2 G; RF sweep rate, 1 MHz/s; rf excitation was broadened to 100 KHz.



**Supp table 1.** Number of generic spin systems (GS) identified for each of the backbone atom types for a previous (i-1)<sup>th</sup> and current i<sup>th</sup> residues.

| Atom Type | Redox State | Number of GS | GS with 'x' number of rungs |    |    |    |    |    |
|-----------|-------------|--------------|-----------------------------|----|----|----|----|----|
|           |             |              | 6                           | 5  | 4  | 3  | 2  | 1  |
| COi-1     | S-S         | 279          | 106                         | 72 | 54 | 29 | 14 | 4  |
|           | SH          | 279          | 62                          | 57 | 68 | 51 | 20 | 21 |
| COi       | S-S         | 187          | 106                         | 62 | 10 | 5  | 4  | 0  |
|           | SH          | 129          | 62                          | 40 | 17 | 6  | 4  | 0  |
| CAi-1     | S-S         | 250          | 106                         | 72 | 53 | 16 | 3  | 0  |
|           | SH          | 189          | 62                          | 56 | 55 | 11 | 4  | 1  |
| CAi       | S-S         | 256          | 106                         | 68 | 51 | 24 | 7  | 0  |
|           | SH          | 242          | 62                          | 53 | 66 | 49 | 12 | 0  |
| CBi-1     | S-S         | 148          | 106                         | 30 | 11 | 1  | 0  | 0  |
|           | SH          | 105          | 62                          | 28 | 14 | 1  | 0  | 0  |
| CBi       | S-S         | 210          | 106                         | 54 | 37 | 13 | 0  | 0  |
|           | SH          | 201          | 62                          | 50 | 52 | 35 | 2  | 0  |

'S-S' and 'SH' denote oxidized and reduced HO-2 respectively. Last 6 columns specify the number of peaks or GS with 6, 5, 4, 3, 2 and 1 rungs. Total number of peaks for S-S and SH forms are same for COi-1 atom and close for CAi and CBi atoms. However, most spin systems in SH HO-2 have fewer matching rungs compared to the S-S form.

**Supp Table 2.** EXAFS Least Squares Fitting Results for the Oxidized Proteins

| Complex     | Coordination/Path | R(Å) <sup>a</sup> | $\sigma^2(\text{Å}^2)^b$ | E <sub>0</sub> (eV) | F <sup>c</sup> |
|-------------|-------------------|-------------------|--------------------------|---------------------|----------------|
| WT          | 4 Fe-N            | 1.98              | 407                      |                     |                |
|             | 2 Fe-N            | 2.05              | 343                      |                     |                |
|             | 2 Fe-C            | 2.99              | 421                      |                     |                |
|             | 8 Fe-C            | 3.04              | /421                     |                     |                |
|             | 16 Fe-C-N         | /3.27             | /421                     | -4.22               | 0.32           |
|             | 4 Fe-C            | 3.74              | 850                      |                     |                |
|             | 8 Fe-C            | 4.28              | 426                      |                     |                |
|             | 16 Fe-C-N         | /4.33             | /426                     |                     |                |
| C127A/C265A | 16 Fe-C-N         | 4.83              | 794                      |                     |                |
|             | 4 Fe-N            | 1.99              | 180                      |                     |                |
|             | 2 Fe-N            | 2.08              | 346                      |                     |                |
|             | 2 Fe-C            | 3.00              | 470                      |                     |                |
|             | 8 Fe-C            | 3.07              | /470                     |                     |                |
|             | 16 Fe-C-N         | /3.29             | /470                     | -2.90               | 0.32           |
|             | 4 Fe-C            | 3.77              | 1190                     |                     |                |
|             | 8 Fe-C            | 4.30              | 325                      |                     |                |
| C127A/C282A | 16 Fe-C-N         | /4.37             | /325                     |                     |                |
|             | 16 Fe-C-N         | 4.88              | 770                      |                     |                |
|             | 5 Fe-N/O          | 2.00              | 429                      |                     |                |
|             | 1 Fe-S            | 2.27              | 854                      |                     |                |
|             | 2 Fe-C            | 2.98              | 340                      |                     |                |
|             | 8 Fe-C            | 3.06              | /340                     |                     |                |
|             | 16 Fe-C-N         | /3.28             | /340                     | -4.39               | 0.33           |
|             | 4 Fe-C            | 3.74              | 984                      |                     |                |
| C127A/C282A | 8 Fe-C            | 4.29              | 413                      |                     |                |
|             | 16 Fe-C-N         | /4.35             | /413                     |                     |                |
|             | 16 Fe-C-N         | 4.84              | 869                      |                     |                |

<sup>a</sup>The estimated standard deviations for the distances are in the order of  $\pm 0.02$  Å.

<sup>b</sup>The  $\sigma^2$  values are multiplied by  $10^5$ .

<sup>c</sup>Error is given by  $\Sigma[(\chi_{\text{obsd}} - \chi_{\text{calcd}})^2 k^6] / \Sigma[(\chi_{\text{obsd}})^2 k^6]$ .

/ indicates the  $\sigma^2$  value for the path is linked to preceding path. The  $S_0^2$  factor was set at 1.0.

**Supp Table 3.** EXAFS Least Squares Fitting Results for the Reduced Proteins

| Complex     | Coordination/Path | R( $\text{\AA}$ ) <sup>a</sup> | $\sigma^2(\text{\AA}^2)$ <sup>b</sup> | E <sub>0</sub> (eV) | F <sup>c</sup> |
|-------------|-------------------|--------------------------------|---------------------------------------|---------------------|----------------|
| WT          | 5 Fe-N/O          | 2.01                           | 375                                   |                     |                |
|             | 1 Fe-S            | 2.26                           | 807                                   |                     |                |
|             | 2 Fe-C            | 2.93                           | 191                                   |                     |                |
|             | 8 Fe-C            | 3.06                           | /191                                  |                     |                |
|             | 16 Fe-C-N         | /3.26                          | /191                                  | -4.50               | 0.31           |
|             | 4 Fe-C            | 3.73                           | 906                                   |                     |                |
|             | 8 Fe-C            | 4.29                           | 441                                   |                     |                |
|             | 16 Fe-C-N         | /4.34                          | /441                                  |                     |                |
|             | 16 Fe-C-N         | 4.82                           | 695                                   |                     |                |
| C127A/C265A | 5 Fe-N/O          | 2.01                           | 569                                   |                     |                |
|             | 1 Fe-S            | 2.27                           | 883                                   |                     |                |
|             | 2 Fe-C            | 2.95                           | 275                                   |                     |                |
|             | 8 Fe-C            | 3.07                           | /275                                  |                     |                |
|             | 16 Fe-C-N         | /3.28                          | /275                                  | -4.83               | 0.33           |
|             | 4 Fe-C            | 3.71                           | 724                                   |                     |                |
|             | 8 Fe-C            | 4.28                           | 320                                   |                     |                |
|             | 16 Fe-C-N         | /4.34                          | /320                                  |                     |                |
|             | 16 Fe-C-N         | 4.81                           | 404                                   |                     |                |
| C127A/C282A | 5 Fe-N/O          | 2.01                           | 512                                   |                     |                |
|             | 1 Fe-S            | 2.26                           | 820                                   |                     |                |
|             | 2 Fe-C            | 3.02                           | 451                                   |                     |                |
|             | 8 Fe-C            | 3.06                           | /451                                  |                     |                |
|             | 16 Fe-C-N         | /3.29                          | /451                                  | -4.78               | 0.33           |
|             | 4 Fe-C            | 3.70                           | 906                                   |                     |                |
|             | 8 Fe-C            | 4.28                           | 397                                   |                     |                |
|             | 16 Fe-C-N         | /4.34                          | /397                                  |                     |                |
|             | 16 Fe-C-N         | 4.84                           | 927                                   |                     |                |

<sup>a</sup>The estimated standard deviations for the distances are in the order of  $\pm 0.02 \text{ \AA}$ .

<sup>b</sup>The  $\sigma^2$  values are multiplied by  $10^5$ .

<sup>c</sup>Error is given by  $\Sigma[(\chi_{\text{obsd}} - \chi_{\text{calcd}})^2 k^6] / \Sigma[(\chi_{\text{obsd}})^2 k^6]$ .

/ indicates the  $\sigma^2$  value for the path is linked to the preceding path. The  $S_0^2$  factor was set at 1.0.
